# Supplementary material
Source: publisher figshare collection journal article supplement (https://karger.figshare.com/ndownloader/files/7694452)
Supplement: Supplementary file 1 [file 7694452]

## **Materials and Methods**

A total of 102 Caucasian patients diagnosed with myotonic dystrophy (DM1) between 2003 and 2015 at the Neuromuscular Unit of Bellvitge Hospital (a 1,000-bed university referral centre in Barcelona, Spain) were included in the study. The clinical charts of the patients were reviewed to collect the cutaneous neoplasms diagnosed during the clinical follow-up in our hospital. Additional information included patient age and gender, and age at diagnosis of cutaneous tumours.

A group of 103 Caucasian patients matched for age and sex were used as the control group. These patients belonged to the same geographic area and were randomly recruited from patients who were admitted to the emergency department because of traumatism.

### *Statistical analyses*

Data were introduced into a database and analysed with SPSS 17.0 for Windows. Categorical variables were compared using the Fisher exact test. Continuous variables were compared using the Student *t* test when the normality of data distribution was confirmed.
